# Supplementary material for: Cycling behaviour of Li/Li4Ti5O12 cells studied by electrochemical impedance spectroscopy
Source: Royal Society of Chemistry journal article supplement (doi:10.1039/c0cp01889a), 2011-01-01
Supplement: c0cp01889a.pdf [file c0cp01889a.pdf]

## Supplemental Material

### Cycling behaviour of Li/Li<sub>4</sub>Ti<sub>5</sub>O<sub>12</sub> cells studied by electrochemical impedance spectroscopy

Nina Schweikert, Horst Hahn, and Sylvio Indris

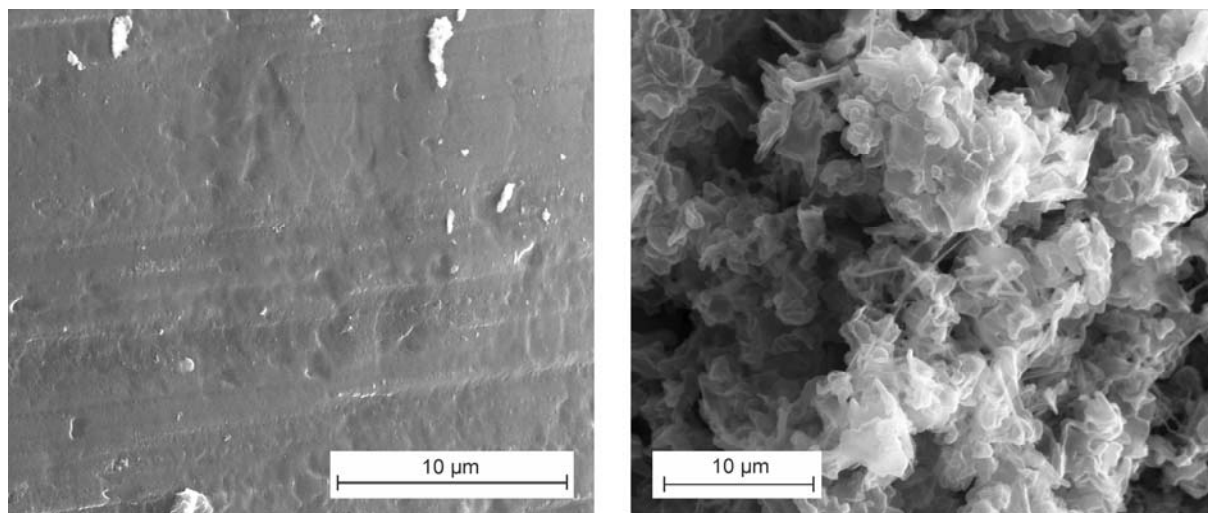

**Fig. S1** SEM micrographs of the Li metal electrode surface before and after cycling against a Li<sub>4</sub>Ti<sub>5</sub>O<sub>12</sub> electrode with constant rate of C/2, i.e. complete discharge within 2 h. Left: initial state, right: after five cycles.
